# Supplementary material for: Redox-induced control of microporosity of zeolitic transition metal oxides based on ε-Keggin iron molybdate at an ultra-fine level
Source: Royal Society of Chemistry journal article supplement (doi:10.1039/d2qi01479c), 2022-01-01
Supplement: d2qi01479c1.pdf [file d2qi01479c1.pdf]

**Supplementary material**

**Redox induced controlling microporosity of zeolitic transition metal oxides based on  $\epsilon$ -Keggin ironmolybdate in an ultra-fine level**

Qingqing Liu,<sup>a</sup> Shufan Yao,<sup>a</sup> Denan Li,<sup>a</sup> Baokai Ma,<sup>a</sup> Tianyi Zhang,<sup>a</sup> Qianqian Zhu,<sup>a\*</sup>

Dingbing He,<sup>b</sup> Masahiro Sadakane,<sup>c</sup> Yanshuo Li,<sup>a,b\*</sup> Wataru Ueda,<sup>d</sup> and Zhenxin Zhang<sup>a\*</sup>

<sup>a</sup> School of Materials Science and Chemical Engineering, Ningbo University, Fenghua Road 818, Ningbo, Zhejiang, 315211, P. R. China. E-mail: zhuqianqian@nbu.edu.cn (Q.Z.), zhangzhenxin@nbu.edu.cn (Z.Z.), liyanshuo@nbu.edu.cn (Y.L.)

<sup>b</sup> Zhejiang Hymater New Materials Co., Ltd. Ningbo, Zhejiang, 315034, P. R. China

<sup>c</sup> Department of Applied Chemistry, Hiroshima University, 1-4-1 Kagamiyama, Higashi Hiroshima 739-8527, Japan

<sup>d</sup> Faculty of Engineering, Kanagawa University; Rokkakubashi, Kanagawa-ku, Yokohama-shi, Kanagawa, 221-8686, Japan

## **Experimental section**

### **1. Synthesis of Na-IM**

**Na-IM** was synthesized according to the reported literature. <sup>1</sup> Na<sub>2</sub>MoO<sub>4</sub>·2H<sub>2</sub>O (2.117 g, 8.75 mmol based on Mo) was dissolved in 26 mL of H<sub>2</sub>O. Then metal Mo (0.15 g, 1.56 mmol) and Fe<sub>3</sub>O<sub>4</sub> (0.192 g, 0.83 mmol) were added in sequence, followed by adding 6.1 mL of H<sub>2</sub>SO<sub>4</sub> (9.1 wt%). The mixture was introduced into a 50 mL stainless-steel well sealed autoclave with a Teflon liner, and the autoclave was fixed in an oven with a mechanical rotation system. Hydrothermal synthesis was performed at 175 °C with tumbling (4.2 rpm) for 48 h. After the hydrothermal reaction and the autoclave had been cooled down, the crude solid was moved to a 100 mL beaker, and 60 mL of water was added. For purification and solid recovery, the resulting suspension (containing the product) was centrifuged (3900 rpm, 5 min), and the solids on the bottom of the centrifugation tube were collected. The unreacted Fe<sub>3</sub>O<sub>4</sub> was removed by a magnet. After addition of 60 mL of H<sub>2</sub>O to the remaining solids, the solution was centrifuged (1500 rpm, 2 min), and the upper suspension solution was obtained. After the process was repeated for three times, the obtained suspension was centrifuged (3900 rpm, 60 min). The solid on the bottom of the centrifugation tube was collected and dried under vacuum.

### **2. Characterization**

Fourier transform infrared spectroscopy (FTIR) was performed on a Bruker Vertex 70. The testing pellet was prepared mixture KBr with the samples homogenously. Powder X-ray diffraction (XRD) patterns were obtained with a Bruker D8 Advance with Cu K $\alpha$  radiation (tube voltage, 40 kV; tube current, 40 mA; scan speed, 8 °/min; 2 $\theta$  range, 5-60°). X-ray photoelectron spectroscopy (XPS) was recorded on a Thermo Scientific K-Alpha. The spectrometer energies were calibrated using the C<sub>1s</sub> peak at 284.8 eV. Thermogravimetry (TG) was carried out on a NETZSCH-STA 2500 Regulus. About 10 mg of dried samples under a N<sub>2</sub> flow of 20 mL/min with a heating rate of 10 °C/min from 20 °C to 600 °C.

### **3. Adsorption experiments**

The materials were calcined at 200 °C for 2 h under a vacuum to remove the occupied H<sub>2</sub>O in these materials before all adsorption experiments. Adsorption of CO<sub>2</sub> and CH<sub>4</sub> were separately carried out on the materials by a Micromeritics (3FLEX) sorption analyzer. Adsorption temperature was kept by at 0 °C and 25 °C, respectively. N<sub>2</sub> adsorption under high pressure was carried out on

Micromeritics (HPVAII-200) sorption analyzer.

### Adsorption enthalpy<sup>2</sup> and ideal adsorption solution theory (IAST) selectivity<sup>3</sup> calculation

In this paper, a dual-site Langmuir–Freundlich equation was used for medium temperature line fitting, adsorption enthalpy calculation and IAST fitting (**Figure S6**), given by

$$q = \frac{q_1 b_1 p^{n_1}}{1 + b_1 p^{n_1}} + \frac{q_2 b_2 p^{n_2}}{1 + b_2 p^{n_2}} \quad (1)$$

Where  $q$  is the adsorption capacity,  $p$  is the pressure,  $q_1$ ,  $q_2$ ,  $b_1$ ,  $b_2$ ,  $n_1$ , and  $n_2$  are fitting parameters.

The resulting  $R^2$  values of the fitting processes were quite close to 1, indicating that simulated isotherms by using the dual-site Langmuir–Freundlich model fitted the experimental isotherms well.

The adsorption enthalpies of  $\text{CO}_2$  and  $\text{CH}_4$  for the material were calculated by the Clausius–Clapeyron equation using the dual-site Langmuir–Freundlich fitting results (**Figure S8** and **Figure S9**) and the equation was as follows:

$$\frac{d \ln p}{dT} = \frac{\Delta H}{RT^2} \quad (2)$$

Here  $p$  was pressure,  $T$  was temperature, and  $\Delta H$  was enthalpy of adsorption.

#### 4. Breakthrough measurement

The breakthrough measurements were performed in a self-made apparatus (**Figure S10**). The sample (1 g) was packed in a stainless-steel adsorption column with an inner diameter of 4.6 mm and a length of 50 mm to form an adsorbent bed. Before the breakthrough measurement, the adsorbent bed was heated under vacuum at 200 °C for 2 h, and cooled to room temperature. The gases with certain flow rates controlled by a flowmeter were mixed and introduced into the adsorbent bed at a certain temperature that was controlled with a water bath or an aluminum beads bath. In the case of the breakthrough measurement under humidity, water was introduced by bubbling and the content was controlled by temperature. The outlet composition was continuously monitored by gas chromatography (Agilent Technologies 7890B) with a thermal conductivity detector (GC-TCD) until the two gases reached equilibrium. Before the cycle breakthrough experiment, the material was heated at 200 °C vacuum for 2 h to remove the adsorbed gas molecules for regeneration.

The water content (percentage) was calculated to show the different water contents in different conditions. The water content was estimated again by the following equation:

$$\text{water content} = \frac{p_{\text{water}}}{p_{\text{total}}} \times 100\% \quad (3)$$

where  $p_{\text{water}}$  is saturated water vapor pressure at a certain temperature,  $p_{\text{total}}$  is the total pressure of the separation column during the breakthrough measurement measured by a pressure sensor, and  $p_{\text{total}}$  of the breakthrough measurements with humidity is 110 kPa.

### Breakthrough selectivity

CO<sub>2</sub>/CH<sub>4</sub> selectivity for **Na-IMs** was defined, the values were calculated by the equation:

$$S_{A/B} = \frac{x_A/y_A}{x_B/y_B} \quad (4)$$

Where  $x_A$  is the adsorption capacity of the final breakthrough gas (mmol/g),  $x_B$  is the adsorption capacity of the first breakthrough gas (mmol/g),  $y_A$  and  $y_B$  are the mole fractions of gas A and gas B in the mixture of gases, respectively.

The adsorption capacity of the gas  $i$  ( $i = A, B$ ) was calculated by the equation:

$$x_i = \frac{V}{22.4 \times m} \times \int_0^t \left(1 - \frac{C(t)}{C_0(t)}\right) dt \quad (5)$$

where  $V$  is flow rate of gas  $i$  (mL/min),  $t$  is the adsorption time (min),  $C$  and  $C_0$  are the inlet and outlet gas molar flow rates, respectively, and  $m$  is the mass of the sample (g).

## 5. Structure modeling and the DFT calculation

The primitive cell was used for DFT calculation. Static binding energy and transition state energy were conducted on Density functional theory (DFT) calculations. Optimizing the structures of the materials was carried out with Vienna Ab initio Simulation Package (VASP).<sup>4,5</sup> The PBE exchange-correlation functional based on generalized gradient approximation was employed.<sup>6</sup> The Plane wave basis sets used to approximate wave functions of valence electrons were included to a 400 eV kinetic energy cut-off. The projector-augmented wave (PAW) method was adopted to describe interactions between valence electrons and atom cores.<sup>7</sup> All calculations were spin-polarized. Gaussian smearing with a width of 0.1 eV was imposed for electron distributions near the Fermi Level. The electronic structures and geometries of structures were optimized until the

energy differences between successive steps were less than  $1 \times 10^{-4}$  eV and  $1 \times 10^{-3}$  eV respectively. For modeling the dispersion interactions, the DFT-D3 method was adopted.<sup>8</sup> The primitive cell used for simulation contains two  $\varepsilon$ -Keggin units. The  $1 \times 1$  unit cell with a corresponding  $3 \times 3 \times 3$  Gamma k-point mesh generated by post-processing VASPKIT package was used.<sup>9, 10</sup>

Complete linear synchronous transit (LST) method was adopted to generate an initial pathway of gas molecules passing through the unit cell.<sup>11</sup> The diffusion barrier energies were obtained with climbing image nudged elastic band (cNEB).<sup>12, 13</sup>

Static binding energy calculation that predicted the interaction of the gas molecule and the solid material. Generally, the formation energy is given by

$$E_s = E_{(\text{material})} + E_{(\text{molecule})} - E_{(\text{material} + \text{molecule})} \quad (6)$$

where  $E_s$  is the static binding energy,  $E_{(\text{material})}$  is the energy of the material,  $E_{(\text{molecule})}$  is the energy of the molecule, and  $E_{(\text{material} + \text{molecule})}$  is the energy of the material with the adsorbed molecule.

Activation energy calculation that predicted the energy difference between the transition state and the energy of the system with molecule in the cavity.

$$\Delta E_t = E_{ts} - E_{(\text{material} + \text{molecule})} \quad (7)$$

where  $\Delta E_t$  is the activation energy,  $E_{ts}$  is the energy of transition state, and  $E_{(\text{material} + \text{molecule})}$  is the energy of the material with the adsorbed molecule.

Structure modeling, average aperture size estimation, and pore volume estimation were performed with the Materials Studio package (Accelrys Software Inc.). The values of unit cell volume are directly calculated by the Materials Studio software package with the program of “atom volumes & surfaces”. The values of average aperture are calculated by the equation:

$$\text{average aperture} = \bar{\varphi} - d_o, \quad (8)$$

where  $\bar{\varphi}$  is the average distance of O in the pore opening in a single cell, which was measured in the Materials Studio software;  $d_o$  is diameter of oxygen atom (2.92 Å).<sup>14</sup>

The values of pore volume are calculated by the equation:

$$\text{pore volume} = \frac{\text{free volume} \times N_A \times 10^{-24}}{M(\text{H}_{18}\text{O}_{80}\text{Fe}_6\text{Mo}_{24})} \quad (9)$$

where  $N_A$  is Avogadro constant,  $M$  is molar mass of the material with the formula of  $\text{H}_{18}\text{O}_{80}\text{Fe}_6\text{Mo}_{24}$ , and free volume was obtained by the Materials Studio software package with the program of “atom volumes & surfaces, Connolly surface, and ultra-fine”.



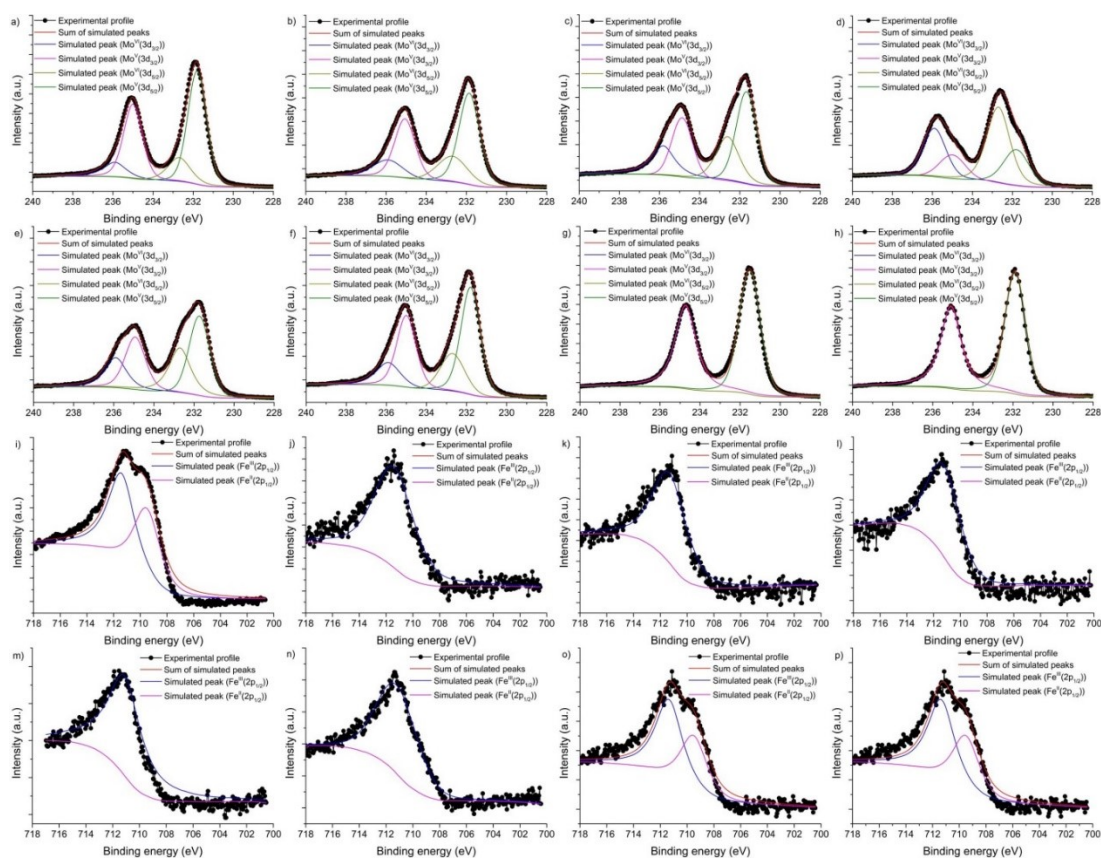

**Figure S1.** XPS profiles of Mo in a) Mo in Na-IM, b) Mo in Na-IMAC40, c) Mo in Na-IMAC80, d) Mo in Na-IMAC150, e) Mo in Na-IMRe0.003, f) Mo in Na-IMRe0.03, g) Mo in Na-IMRe0.1, h) Mo in Na-IMRe0.3, i) Fe in Na-IM, j) Fe in Na-IMAC40, k) Fe in Na-IMAC80, l) Fe in Na-IMAC150, m) Fe in Na-IMRe0.003, n) Fe in Na-IMRe0.03, o) Fe in Na-IMRe0.1, and p) Fe in Na-IMRe0.3.

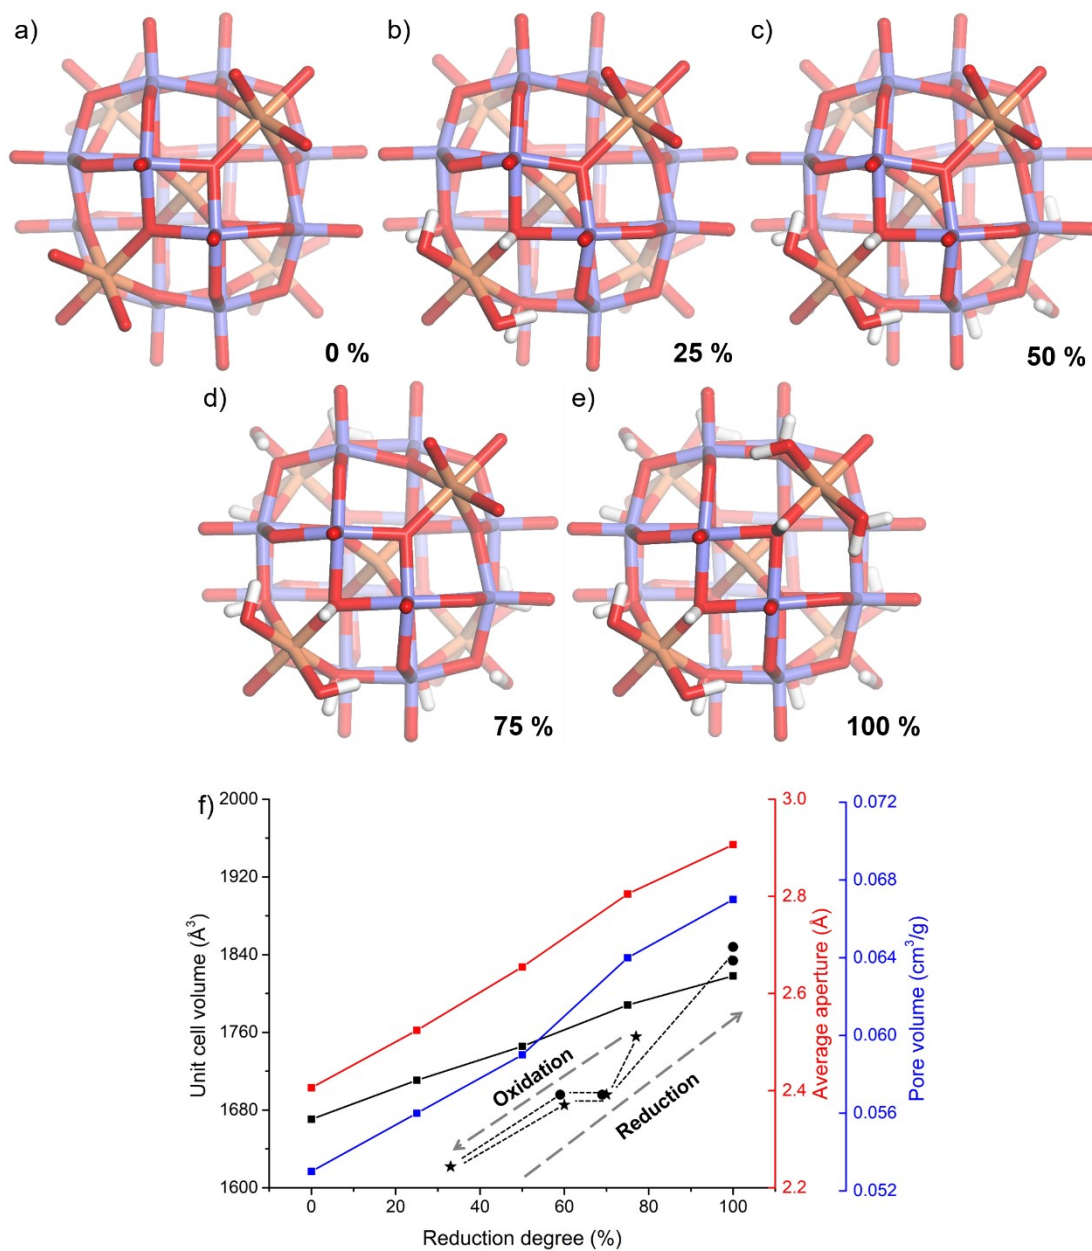

**Figure S2.** Structure models of  $\epsilon$ -Keggin POM unit of Na-IM with the reduction degrees of a) 0%, b) 25%, c) 50%, d) 75%, and e) 100% and f) corresponding theoretical (black solid line) and experimental (black dash line) unit cell volume, average pore volume (red solid line), and pore volume (blue solid line) changes with reduction degree, Mo (lilac), Fe (orange), O (red), H (white).



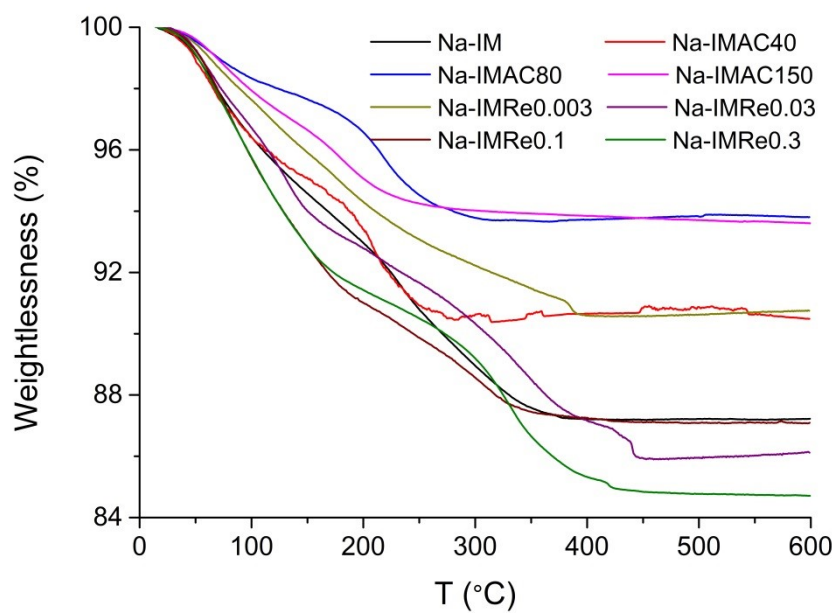

**Figure S3.** TG curve of Na-IM, Na-IMAC40, Na-IMAC80, Na-IMAC150, Na-IMRe0.003, Na-IMRe0.03, Na-IMRe0.1, and Na-IMRe0.3.

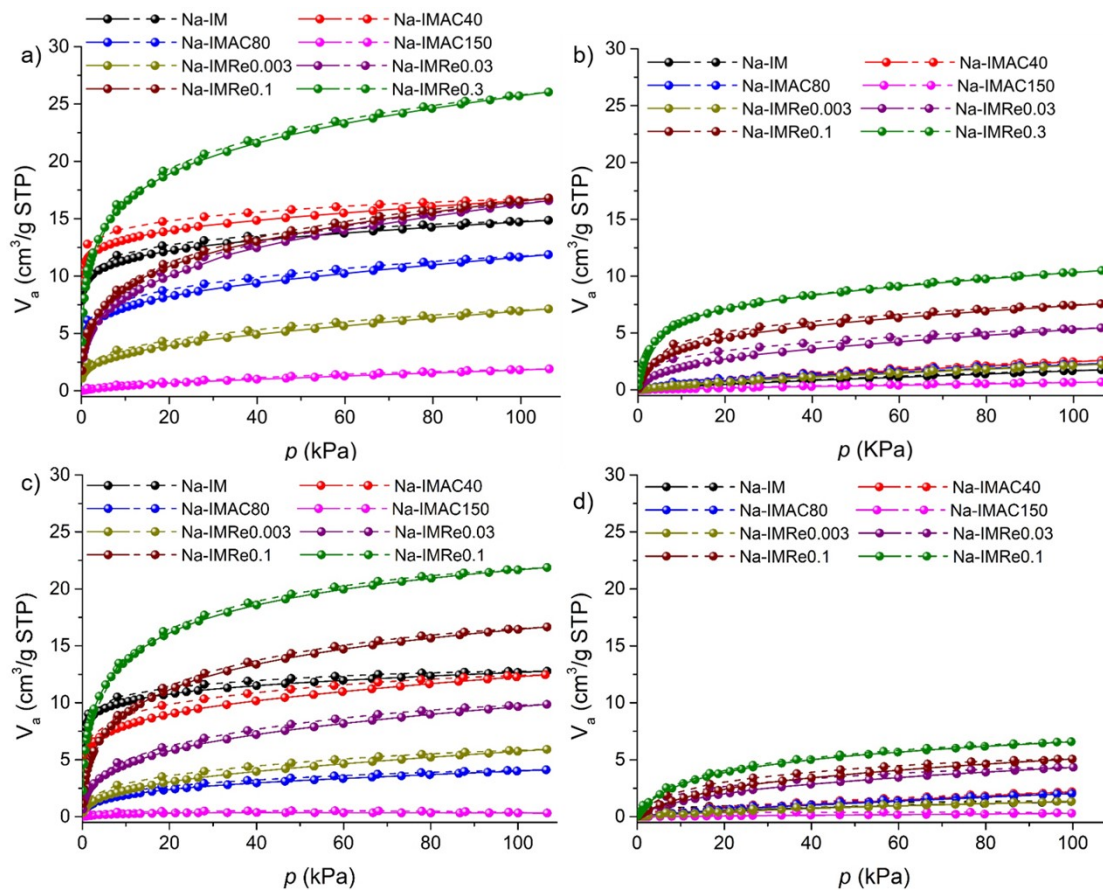

**Figure S4.** a) CO<sub>2</sub> and b) CH<sub>4</sub> adsorption (solid line)-desorption (dash line) isotherms of Na-IM, Na-IMAC40, Na-IMAC80, Na-IMAC150, Na-IMRe0.003, Na-IMRe0.03, Na-IMRe0.1, and Na-IMRe0.3 at 0 °C. c) CO<sub>2</sub> and d) CH<sub>4</sub> adsorption (solid line)-desorption (dash line) isotherms of Na-IM, Na-IMAC40, Na-IMAC80, Na-IMAC150, Na-IMRe0.003, Na-IMRe0.03, Na-IMRe0.1, and Na-IMRe0.3 at 25 °C.

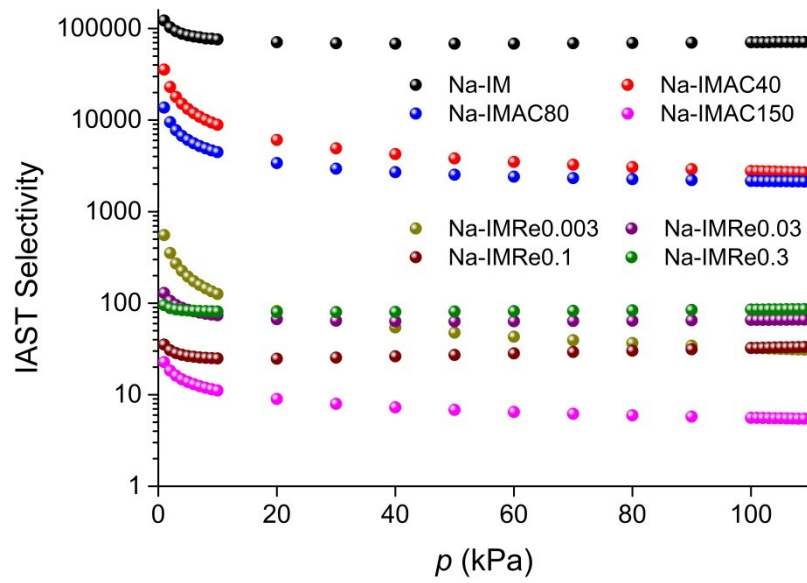

**Figure S5.** IAST selectivity of  $\text{CO}_2/\text{CH}_4$  with the ratio of 1/1 (v/v) for **Na-IMs**

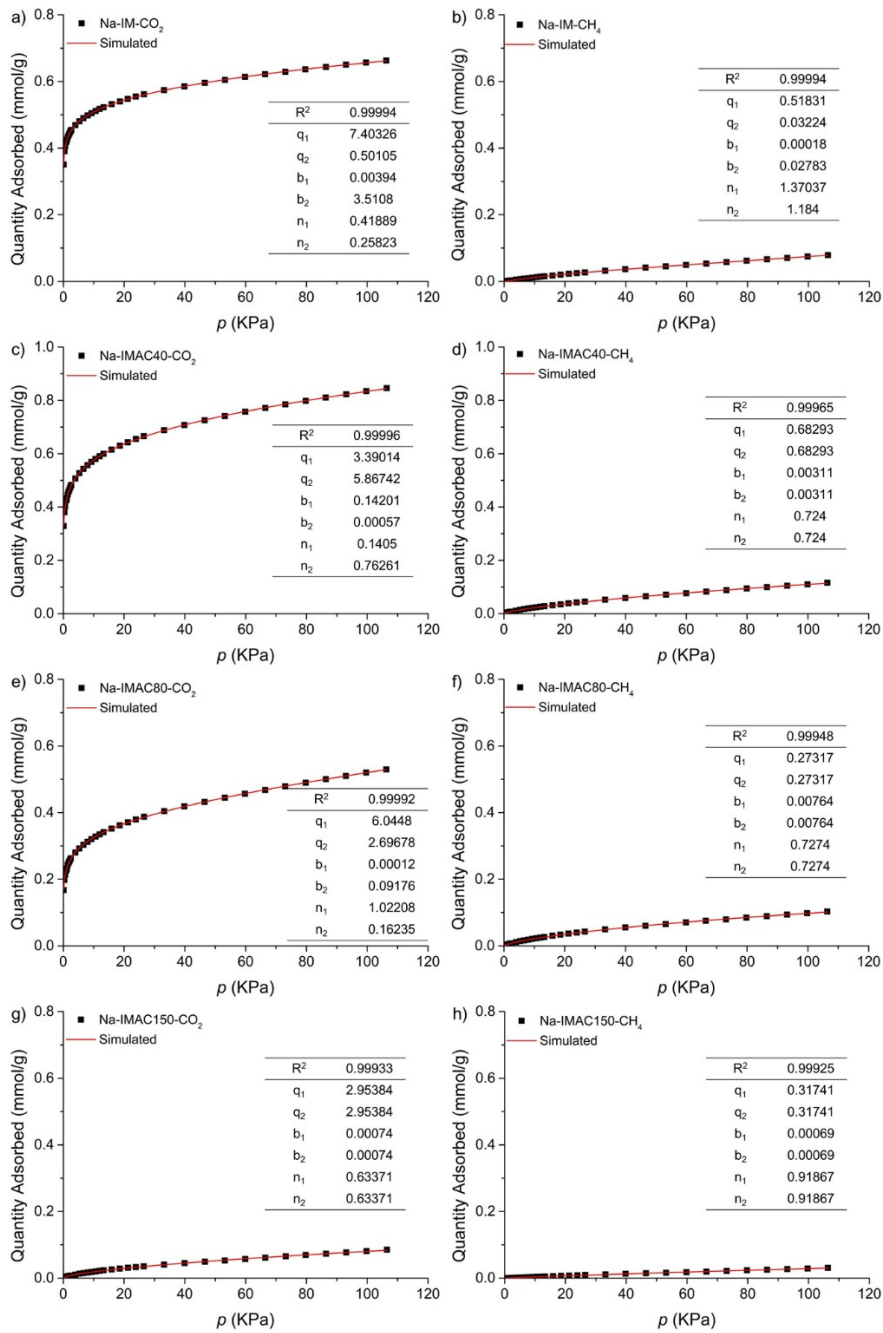

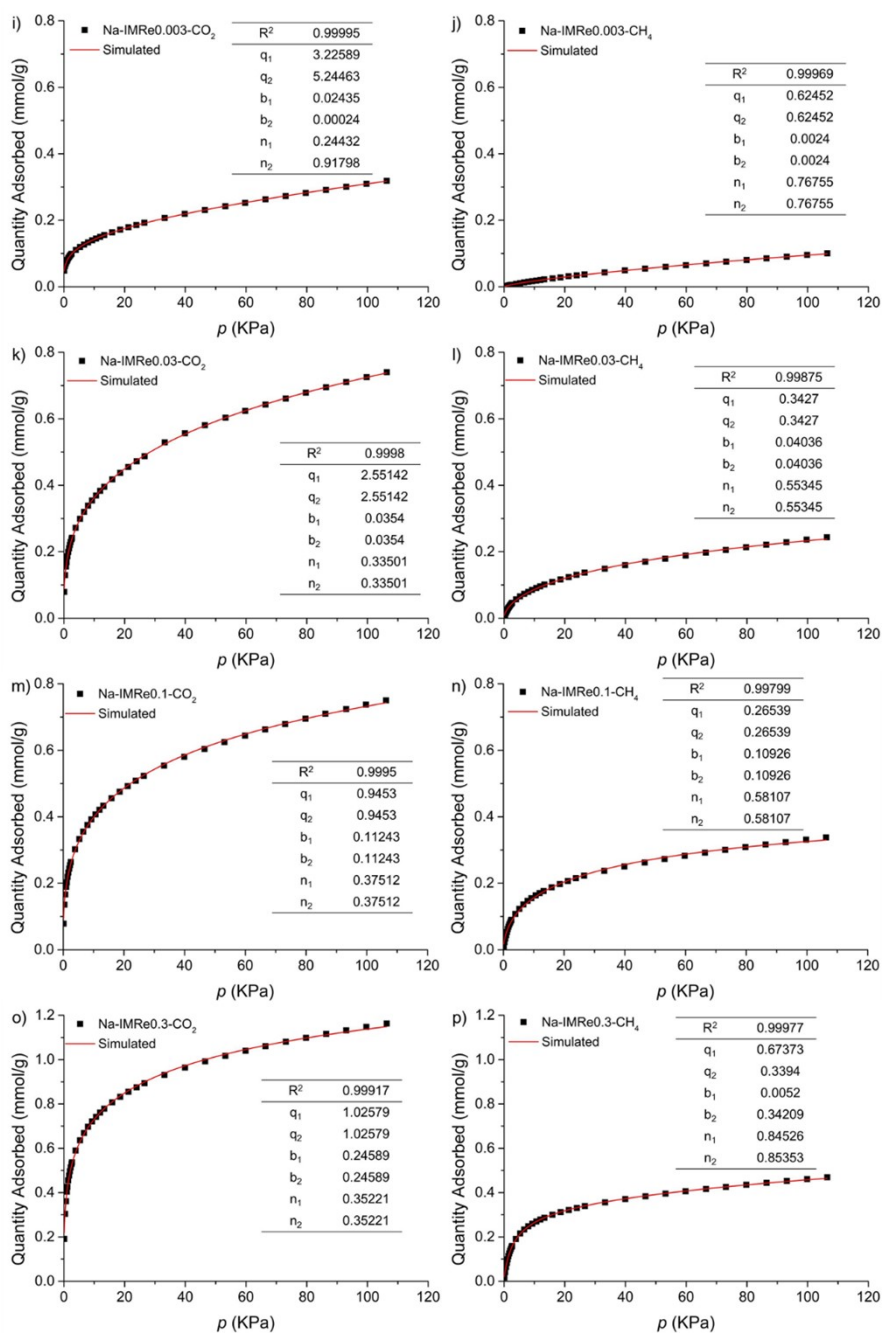

**Figure S6.** CO<sub>2</sub> and CH<sub>4</sub> adsorption isotherms and the fitting with the dual-site Langmuir-Freundlich model for the IAST selectivity calculation, a) CO<sub>2</sub> adsorption of Na-IM, b) CH<sub>4</sub> adsorption of Na-IM, c) CO<sub>2</sub> adsorption of Na-IMAC40, d) CH<sub>4</sub> adsorption of Na-IMAC40, e) CO<sub>2</sub> adsorption of Na-IMAC80, f) CH<sub>4</sub> adsorption of Na-IMAC80, g) CO<sub>2</sub> adsorption of Na-IMAC150, h) CH<sub>4</sub> adsorption of Na-IMAC150, i) CO<sub>2</sub> adsorption of Na-IMRe0.003, j) CH<sub>4</sub> adsorption of Na-IMRe0.003, k) CO<sub>2</sub> adsorption of Na-IMRe0.03, l) CH<sub>4</sub> adsorption of Na-IMRe0.03, m) CO<sub>2</sub> adsorption of Na-IMRe0.1, n) CH<sub>4</sub> adsorption of Na-IMRe0.1, o) CO<sub>2</sub> adsorption of Na-IMRe0.3, and p) CH<sub>4</sub> adsorption of Na-IMRe0.3 at 0 °C.

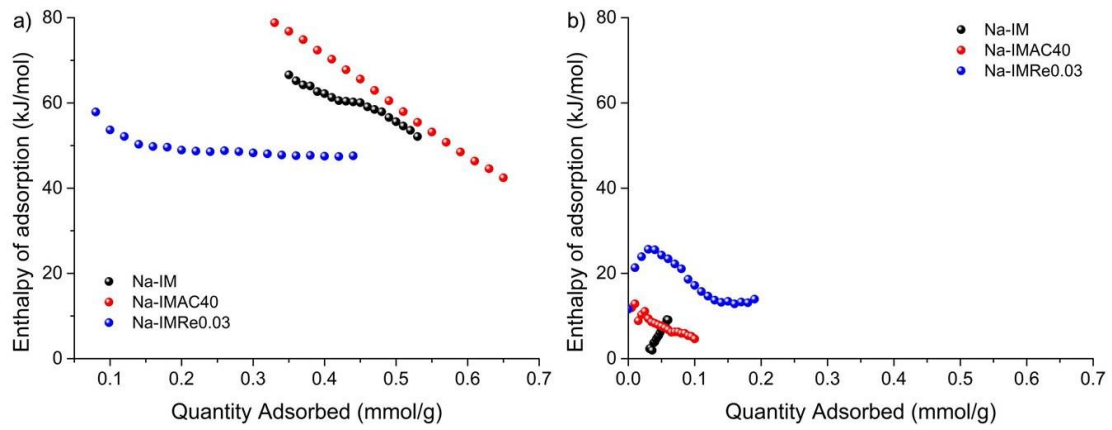

**Figure S7.** Adsorption enthalpy of a) CO<sub>2</sub> and b) CH<sub>4</sub> for Na-IM, Na-IMAC40, and Na-IMRe0.03.

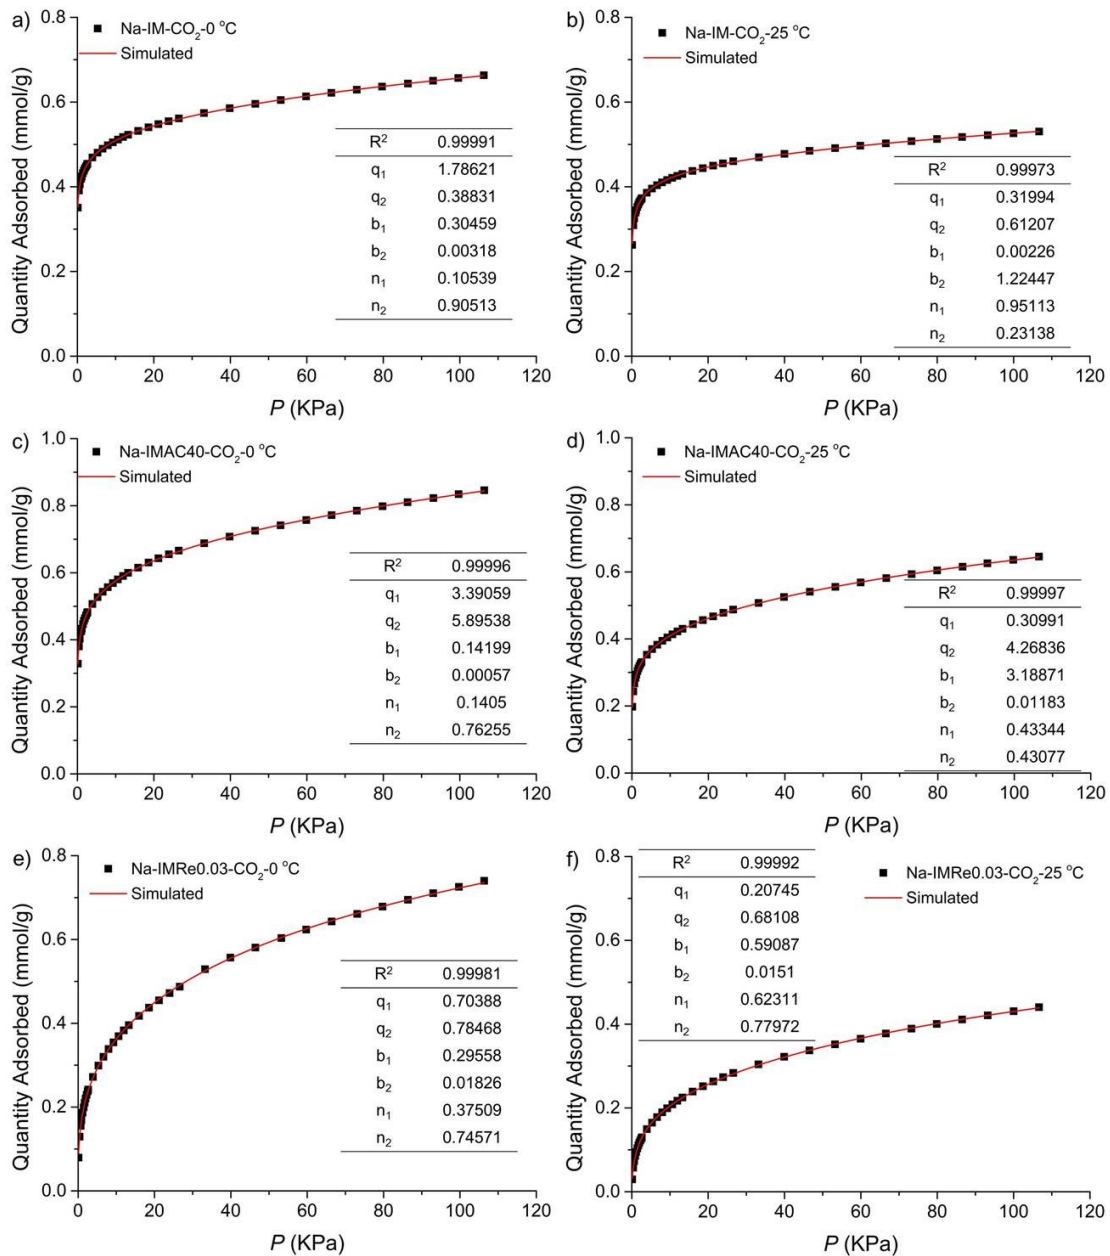

**Figure S8.** CO<sub>2</sub> adsorption isotherms and the fitting with the dual-site Langmuir-Freundlich model for the adsorption enthalpy calculation, a) **Na-IM** at 0 °C, b) **Na-IM** at 25 °C, c) **Na-IMAC40** at 0 °C, d) **Na-IMAC40** at 25 °C, e) **Na-IMRe0.03** at 0 °C, and f) **Na-IMRe0.03** at 25 °C.

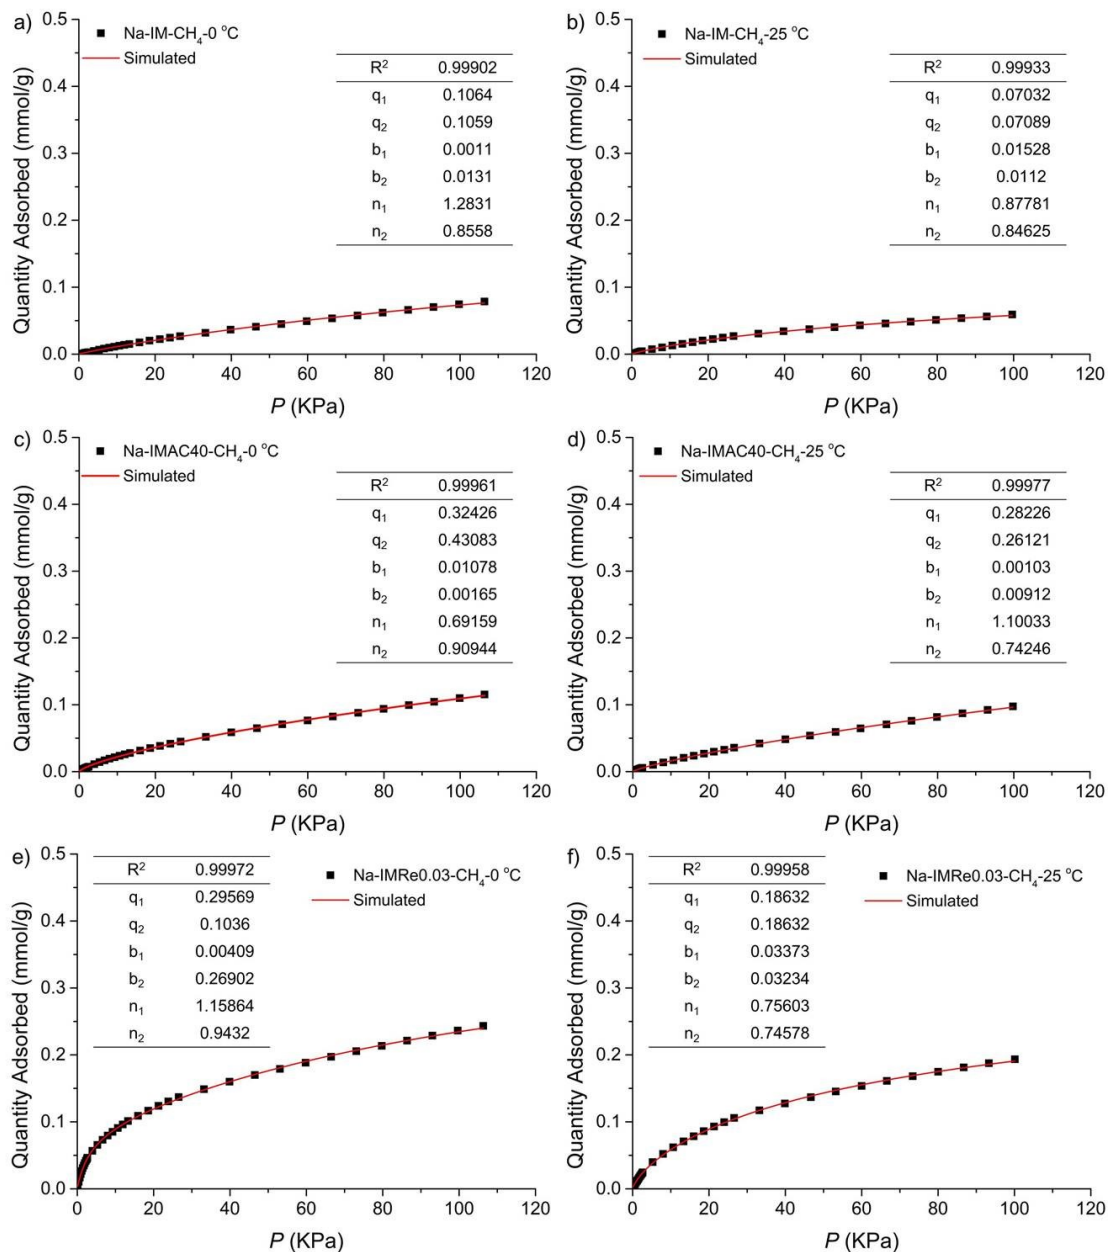

**Figure S9.** CH<sub>4</sub> adsorption isotherms and the fitting with the dual-site Langmuir-Freundlich model for the adsorption enthalpy calculation, a) **Na-IM** at 0 °C, b) **Na-IM** at 25 °C, c) **Na-IMAC40** at 0 °C, d) **Na-IMAC40** at 25 °C, e) **Na-IMRe0.03** at 0 °C, and f) **Na-IMRe0.03** at 25 °C.



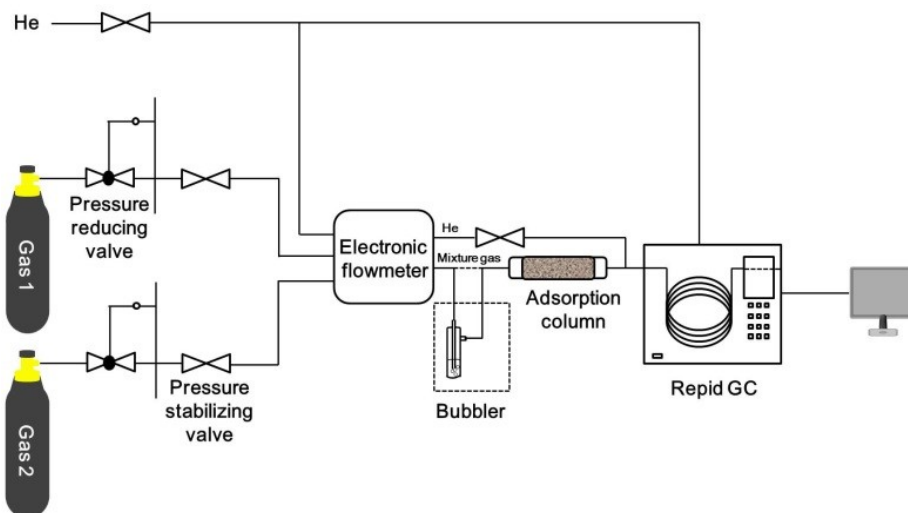

**Figure S10.** Schematic figure of the instrument for the breakthrough measurements.

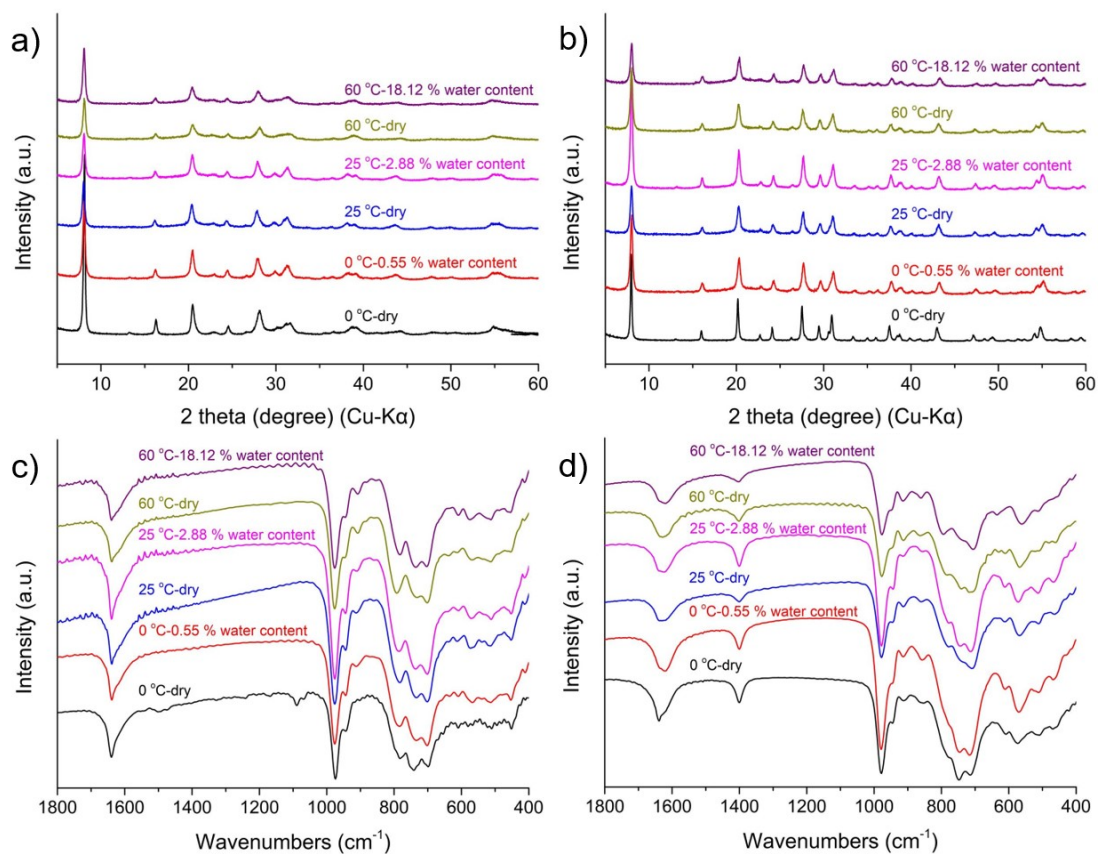

**Figure S11.** XRD patterns of a) Na-IMAC40 and b) Na-IMRe0.3 and FTIR spectra of c) Na-IMAC40 and d) Na-IMRe0.3 after the breakthrough measurements under different conditions.

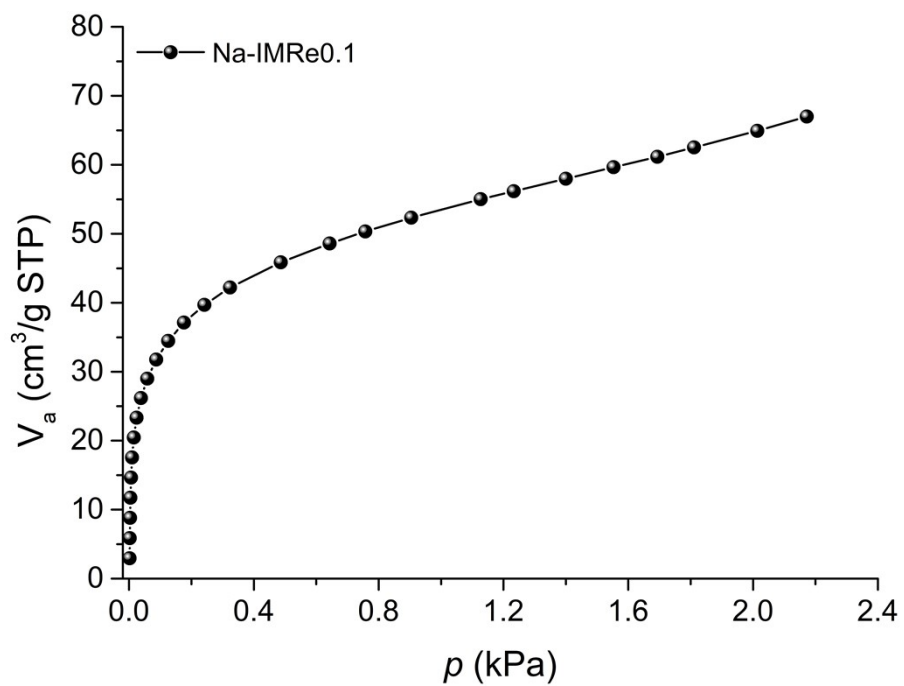

**Figure S12.** The water vapor adsorption of Na-IMRe0.1.

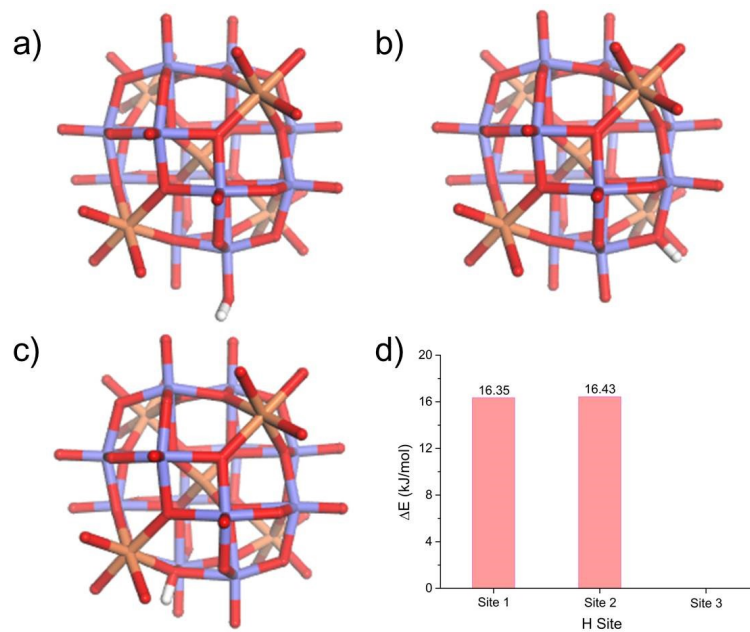

**Figure S13.** Structure models of  $\epsilon$ -Keggin POM unit with different H sites, a) H in Site 1, b) H in Site 2, c) H in Site 3, and d) corresponding system energies with different H sites. Mo (lilac), Fe (orange), O (red), H (white).

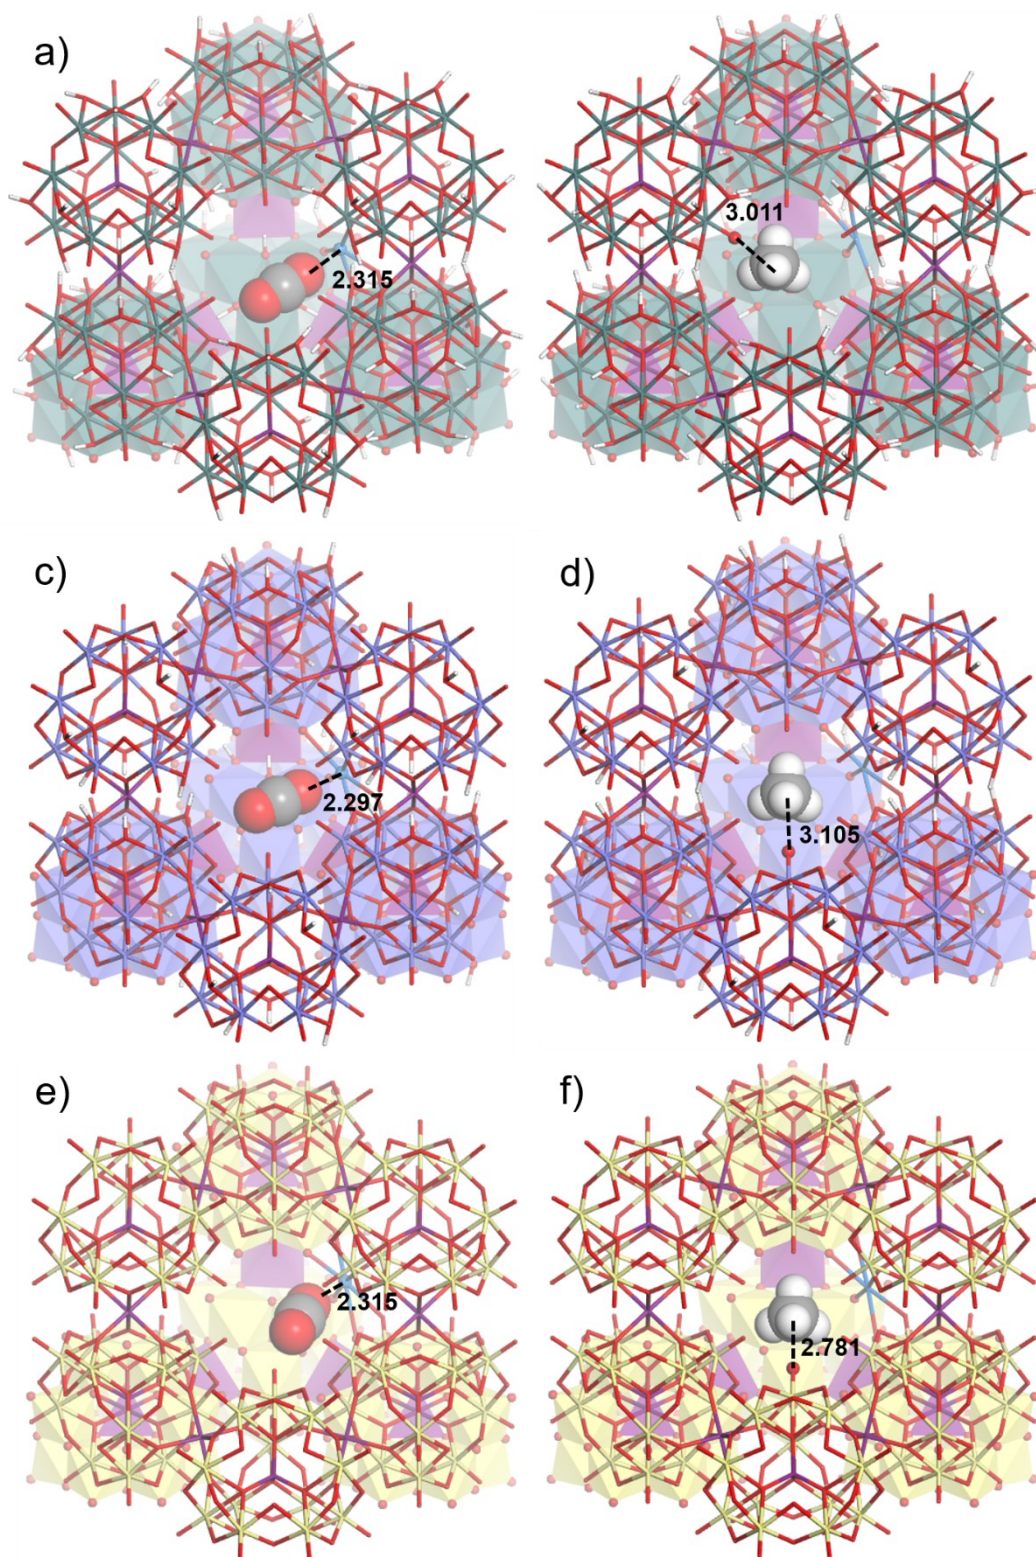

**Figure S14.** Structural models of **Na-IM** with different reduction degree. a)  $\text{CO}_2$  and b)  $\text{CH}_4$  in the cavity of **Na-IM** with 100% reduction degree. c)  $\text{CO}_2$  and d)  $\text{CH}_4$  in the cavity of **Na-IM** with 50% reduction degree. e)  $\text{CO}_2$  and f)  $\text{CH}_4$  in the cavity of **Na-IM** with 0% reduction degree, Mo (green, lilac, and yellow), Fe (purple), O (red), H (white), C (grey), Na (blue).

**Table S1.** Valence of Mo and Fe and reduction degree for **Na-IMs**.

| Materials           | Mo <sup>V</sup> : Mo <sup>VI</sup> | Fe <sup>III</sup> : Fe <sup>II</sup> | Reduction degree (%)<br>(Based on Mo) |
|---------------------|------------------------------------|--------------------------------------|---------------------------------------|
| <b>Na-IM</b>        | 3.28                               | 1.28                                 | 77                                    |
| <b>Na-IMAC40</b>    | 2.34                               | ∞                                    | 70                                    |
| <b>Na-IMAC80</b>    | 1.5                                | ∞                                    | 60                                    |
| <b>Na-IMAC150</b>   | 0.49                               | ∞                                    | 33                                    |
| <b>Na-IMRe0.003</b> | 1.45                               | ∞                                    | 59                                    |
| <b>Na-IMRe0.03</b>  | 2.25                               | ∞                                    | 69                                    |
| <b>Na-IMRe0.1</b>   | ∞                                  | 1.45                                 | 100                                   |
| <b>Na-IMRe0.3</b>   | ∞                                  | 1.25                                 | 100                                   |

**Table S2.** Microporosity of Na-IMs with different reduction degrees

| Material     | Reduction degree/%<br>(Based Mo) | Limiting micropore volume/cm <sup>3</sup> g <sup>-1</sup> STP (CO <sub>2</sub> ) | Limiting micropore volume/cm <sup>3</sup> g <sup>-1</sup> STP (CH <sub>4</sub> ) | maximum adsorption capacity/cm <sup>3</sup> g <sup>-1</sup> (CO <sub>2</sub> ) | maximum adsorption capacity/cm <sup>3</sup> g <sup>-1</sup> (CH <sub>4</sub> ) | Pore volume/cm <sup>3</sup> g <sup>-1</sup> (N <sub>2</sub> ) | Pore size/Å | BET surface area /cm <sup>2</sup> g <sup>-1</sup> | The number of CO <sub>2</sub> in a cage | The number of CH <sub>4</sub> in a cage |
|--------------|----------------------------------|----------------------------------------------------------------------------------|----------------------------------------------------------------------------------|--------------------------------------------------------------------------------|--------------------------------------------------------------------------------|---------------------------------------------------------------|-------------|---------------------------------------------------|-----------------------------------------|-----------------------------------------|
| Na-IM        | 77                               | 0.0283                                                                           | 0.0066                                                                           | 14.85                                                                          | 1.76                                                                           | 0.0141                                                        | 5.89        | 33.9                                              | 1.208                                   | 0.157                                   |
| Na-IMAC40    | 70                               | 0.0320                                                                           | 0.0072                                                                           | 16.74                                                                          | 1.72                                                                           | 0.0138                                                        | 5.93        | 33.4                                              | 1.508                                   | 0.154                                   |
| Na-IMAC80    | 60                               | 0.0223                                                                           | 0.0067                                                                           | 12.48                                                                          | 1.81                                                                           | 0.0134                                                        | 6.07        | 32.2                                              | 1.111                                   | 0.161                                   |
| Na-IMAC150   | 33                               | 0.0028                                                                           | 0.0028                                                                           | 1.90                                                                           | 0.69                                                                           | 0.0098                                                        | 6.51        | 23.8                                              | 0.169                                   | 0.061                                   |
| Na-IMRe0.003 | 59                               | 0.0112                                                                           | 0.0047                                                                           | 7.14                                                                           | 2.25                                                                           | 0.0141                                                        | 6.10        | 33.9                                              | 0.635                                   | 0.200                                   |
| Na-IMRe0.03  | 69                               | 0.0287                                                                           | 0.0118                                                                           | 16.58                                                                          | 5.45                                                                           | 0.0352                                                        | 3.87        | 84.6                                              | 1.476                                   | 0.485                                   |
| Na-IMRe0.1   | 100                              | 0.0313                                                                           | 0.0177                                                                           | 16.80                                                                          | 7.57                                                                           | 0.0341                                                        | 3.94        | 81.8                                              | 1.496                                   | 0.674                                   |
| Na-IMRe0.3   | 100                              | 0.0504                                                                           | 0.0250                                                                           | 26.05                                                                          | 10.50                                                                          | 0.0210                                                        | 5.26        | 50.7                                              | 2.319                                   | 0.935                                   |

The values of the number of gases in a cage were calculated by the equation:

$$\text{the number of gases in a cage} = \frac{\text{adsorbed amount (cm}^3/\text{g)} \times \text{molecule weight of the material (g/mol)}}{22400 \text{ (cm}^3/\text{mol)}}$$

**Table S3.** Separation performance of CO<sub>2</sub>/CH<sub>4</sub> for **Na-IMs** with different reduction degrees.

| Material            | Reduction degree (%)<br>(Based Mo) | Breakthrough selectivity | $\Delta t_b$ (min) |
|---------------------|------------------------------------|--------------------------|--------------------|
| <b>Na-IM</b>        | 77                                 | 25.7                     | 37                 |
| <b>Na-IMAC40</b>    | 70                                 | 21.4                     | 35                 |
| <b>Na-IMAC80</b>    | 60                                 | 35.0                     | 34                 |
| <b>Na-IMAC150</b>   | 33                                 | 2.6                      | 4                  |
| <b>Na-IMRe0.003</b> | 59                                 | 4.3                      | 7                  |
| <b>Na-IMRe0.03</b>  | 69                                 | 8.6                      | 65                 |
| <b>Na-IMRe0.1</b>   | 100                                | 18.6                     | 62                 |
| <b>Na-IMRe0.3</b>   | 100                                | 31.8                     | 60                 |



## References

1. Q. Zhu, S. Yin, M. Zhou, J. Wang, C. Chen, P. Hu, X. Jiang, Z. Zhang, Y. Li and W. Ueda Aerobic alcohol oxidation by a zeolitic octahedral metal oxide based on iron vanadomolybdates under mild conditions, *ChemCatChem*, 2021, **13**, 1763-1771.
2. Z. Zhang, M. Sadakane, S. Noro, T. Murayama, T. Kamachi, K. Yoshizawa and W. Ueda, Selective carbon dioxide adsorption of  $\epsilon$ -Keggin-type zirconomolybdate-based purely-Inorganic 3D frameworks, *J. Mater. Chem. A*, 2015, **3**, 746-755.
3. A. L. Myers and J. M. Prausnitz, Thermodynamics of mixed-gas adsorption, *Aiche J.*, 1965, **11**, 121-127.
4. G. Kresse, Ab-Initio Molecular-Dynamics for Liquid-Metals, *J. Non-Cryst. Solids*, 1995, **193**, 222-229.
5. G. Kresse and J. Hafner, Ab initio molecular dynamics for liquid metals, *Phys. Rev. B Condens. Matter.*, 1993, **47**, 558-561.
6. J. P. Perdew, K. Burke and M. Ernzerhof, Generalized gradient approximation made simple, *Phys. Rev. Lett.*, 1996, **77**, 3865-3868.
7. P. E. Blöchl, Projector augmented-wave method, *Phys. Rev. B*, 1994, **50**, 17953.
8. S. Grimme, J. Antony, S. Ehrlich and H. Krieg, A consistent and accurate ab initio parametrization of density functional dispersion correction (DFT-D) for the 94 elements H-Pu, *J. Chem. Phys.*, 2010, **132**, 154104.
9. V. Wang, N. Xu, J. Liu, G. Tang, W. Geng, VASPKIT: A user-friendly interface facilitating high-throughput computing and analysis using VASP code, *Comput. Phys. Commun.*, 2021, **267**, 108033.
10. C. Hu, Heat-current operator and transport entropy of vortices in type-II superconductors, *Phys. Rev. B*, 1976, **13**, 4780-4783.
11. T. A. Halgren and W. N. Lipscomb, The synchronous-transit method for determining reaction pathways and locating molecular transition states, *Chem. Phys. Lett.*, 1977, **49**, 225-232.
12. G. Henkelman, B. P. Uberuaga and H. Jonsson, A climbing image nudged elastic band method for finding saddle points and minimum energy paths, *J. Chem. Phys.*, 2000, **113**, 9901-9904.
13. G. Henkelman and H. Jonsson, Improved tangent estimate in the nudged elastic band method for finding minimum energy paths and saddle points, *J. Chem. Phys.*, 2000, **113**, 9978-9985.
14. J. Tsai, R. Taylor, C. Chothia, and M. Gerstein, The Packing Density in Proteins: Standard Radii and Volumes, *J. Mol. Biol.*, 1999, **290**, 253-266.
